# Supplementary material
Source: ML conference proceedings conference paper supplement (https://aclanthology.org/2020.insights-1.3)
Supplement: OptionalSupplementaryMaterial [file Appendix.pdf › Appendix.pdf]

## A Label Mapping

| ATIS Slot                                                                                                                                                                                 | OntoNotes Label |
|-------------------------------------------------------------------------------------------------------------------------------------------------------------------------------------------|-----------------|
| AIRLINE_NAME                                                                                                                                                                              | ORG             |
| AIRPORT_NAME                                                                                                                                                                              | FAC             |
| ARRIVE_DATE,<br>DAY_NAME,<br>DAY_NUMBER,<br>DEPART_DATE,<br>DEPART_TIME,<br>FLIGHT_DAYS, RETURN_DATE,<br>TIME_RELATIVE, TO-<br>DAY_RELATIVE                                               | DATE            |
| ARRIVE_TIME,<br>MONTH_NAME,<br>PERIOD_OF_DAY,<br>TURN_TIME, TIME                                                                                                                          | TIME            |
| CITY_NAME,<br>FROM_LOC,<br>STATE_CODE,<br>STATE_NAME,<br>STOP_LOC, TO_LOC                                                                                                                 | GPE             |
| COST_RELATIVE,<br>FARE_AMOUNT                                                                                                                                                             | MONEY           |
| DAYS_CODE, ECONOMY,<br>FARE_BASIS_CODE,<br>FLIGHT_MOD,<br>MEAL, MEAL_CODE,<br>MEAL_DESCRIPTION,<br>MOD, FLIGHT_STOP,<br>FLIGHT_MOD, OR,<br>RESTRICTION_CODE,<br>ROUNDTRIP, TRANSPORT_TYPE | O               |
| FLIGHT_NUMBER                                                                                                                                                                             | CARDINAL        |

Table 3: Label Mapping from ATIS to OntoNotes.

## B Hyperparameters

| Hyperparameter                | Value |
|-------------------------------|-------|
| LSTM cell size                | 100   |
| Dropout                       | 0.5   |
| Word embedding dimension      | 300   |
| Character embedding dimension | 100   |
| Mini-batch size               | 128   |
| Optimizer                     | Adam  |
| Learning rate                 | X     |
| Number of epoch               | 20    |
| Early stopping                | 10    |

Table 4: Hyperparameters for the neural models used in STL and MTL

| Parameter                           | Adopted value                         |
|-------------------------------------|---------------------------------------|
| Surrogate model                     | Gaussian Processes with MCMC sampling |
| Acquisition function                | Expected Logarithmic Improvement      |
| Number of initial evaluation points | 3                                     |
| Search space upper bound            | 1                                     |
| Search space lower bound            | -1                                    |
| Number of iterations                | 50                                    |

Table 5: Parameters used by the Bayesian Optimizer.

## C Domain Similarity

| $\mathcal{D}_T$ | $\mathcal{D}_S$ |      |      |      |      |      | Avg  | $\Delta$ |
|-----------------|-----------------|------|------|------|------|------|------|----------|
|                 | TC              | NW   | BC   | BN   | WB   | MZ   |      |          |
| TC              | -               | 0.74 | 0.84 | 0.80 | 0.83 | 0.77 | 0.80 | 1.7      |
| NW              | 0.74            | -    | 0.85 | 0.91 | 0.91 | 0.90 | 0.86 | 0.7      |
| BC              | 0.84            | 0.85 | -    | 0.90 | 0.90 | 0.86 | 0.87 | 0.02     |

Table 6: Domain Similarity (JSD) for each  $\mathcal{D}_T$  and  $\mathcal{D}_S$ , and the  $\Delta$  gap between the best data selection method and  $\mathcal{D}_{all}$ .
